1 **Innovating Urban Mosquito Control: Introducing Human-Controlled Breeding Sites as a**  
2 **Component of Integrated Mosquito Management (IMM)**

3 Guillermo A. Baigorria<sup>1,2</sup> and Consuelo C. Romero<sup>1,2</sup>

4 <sup>1</sup> Next Season Systems LLC, Department of Research and Development, Lincoln, NE 68506, USA

5 <sup>2</sup> Gikarix SAC, Department of Research and Development. La Molina, Lima, 15024, Peru

6 **ABSTRACT:**

7 This study introduces a novel method for mosquito control tailored specifically for urban and  
8 suburban areas, addressing their unique challenges. The concept of Human-Controlled Breeding  
9 Sites (HCBS) is presented as an innovative approach to reducing mosquito populations by  
10 providing controlled oviposition sites within households. The paper is structured into three main  
11 components. The first details the meticulous development of the HCBS method, the second  
12 explores the intricate development of the HCBS device, crucial for effective implementation of  
13 the HCBS approach. Finally, the experiment validating the HCBS methodology is described,  
14 offering insights into its practical application and efficacy in mosquito population control. Our  
15 proposal emphasizes the importance of considering mosquito needs, behavior and preferences in  
16 designing effective mosquito control strategies. Gravid mosquitoes must find a suitable place for  
17 oviposition, and HCBS provides an easy-access controlled environment for them to do so within  
18 households. Contrary to the commonly current recommendation to destroy all possible locations  
19 where mosquitoes can lay their eggs, the HCBS methodology provides an opportunity for gravid  
20 mosquitoes to oviposit their eggs without being deterred by chemical odors or dead larvae or  
21 pupae. It involves waiting for a timespan before effectively collecting and destroying the  
22 individuals in one concerted effort with zero impact on the environment and at minimal cost.  
23 Successful deposition of eggs by gravid mosquitoes into HCBS devices, followed by their  
24 destruction within the designated timeframe, validates the system's efficacy in disrupting the

1 mosquito life cycle. Moreover, our findings demonstrate the significant influence of color  
2 selection on HCBS effectiveness, with green HCBS devices being the preferred choice, although  
3 not an indispensable condition for oviposition. These integrated components offer a  
4 comprehensive understanding of the HCBS approach, effectively bridging the gap between  
5 methodological development, device design, and practical application. The findings underscore  
6 HCBS as a valuable addition to mosquito control strategies, with potential applications in diverse  
7 environments. Further research is essential to delve into and model the long-term effectiveness of  
8 HCBS, aiming to optimize its design for maximum efficacy and scalability. This includes  
9 studying its performance over extended periods and refining the design parameters to enhance its  
10 functionality and widespread applicability including the use of disaster risk management  
11 systems.

12 **Keywords:** *Mosquito control, Human-Controlled Breeding Sites (HCBS), Integrated Mosquito*  
13 *Management, Oviposition sites, Vector control methods, Gravid female mosquitoes, Mosquito life*  
14 *cycle, Public health*

## 15 **1. INTRODUCTION:**

16 Climate change has emerged as a significant driver of mosquito population dynamics,  
17 contributing to the expansion of mosquito habitats into new geographic regions (Mora, et al.,  
18 2022). Rising temperatures, altered precipitation patterns, and changes in humidity create  
19 favorable conditions for mosquito breeding and survival, facilitating their spread into previously  
20 unaffected areas (Lafferty, 2009). As a result, regions that were once considered free from  
21 mosquito-borne diseases are now at risk of transmission due to the establishment of mosquito  
22 populations in these newly suitable habitats.

1           Urbanization exacerbates the impact of climate change on mosquito-borne disease  
2 transmission by creating environments conducive to mosquito proliferation. Rapid urban growth,  
3 particularly in tropical and subtropical regions, leads to the development of densely populated  
4 urban and suburban areas with abundant breeding sites for mosquitoes, such as discarded  
5 containers, sewage systems, and stormwater drains (Ananya and Miller, 2021; Guagliardo et al.,  
6 2015). The convergence of increased human population density and expanding mosquito  
7 populations in urban settings creates ideal conditions for the transmission of diseases like  
8 Dengue fever, Malaria, West Nile virus, yellow fever and Zika virus among others.

9           Traditional mosquito control methods, primarily developed for rural environments with  
10 low population density, face significant challenges in urban and suburban areas. The widespread  
11 use of chemical insecticides may be impractical or environmentally undesirable in densely  
12 populated urban settings, while biological control methods may be less effective due to the  
13 limited availability of natural habitats for mosquito predators and parasites (Chadee et al., 2009).  
14 Moreover, the heterogeneous and dynamic nature of urban landscapes poses challenges for  
15 implementing source reduction and habitat modification strategies.

16           Addressing the growing threat of mosquito-borne diseases in urban and suburban areas  
17 requires the development of innovative and context-specific control methods tailored to urban  
18 environments. Integrated approaches that combine novel vector control technologies with  
19 community engagement and public health interventions offer promising solutions for mitigating  
20 disease transmission in urban settings (Muller et al., 2020). These approaches may include the  
21 use of novel larvicides targeting mosquito breeding sites in urban landscapes, deployment of  
22 spatial repellents to protect high-risk populations, and implementation of community-based  
23 surveillance and response systems to detect and control disease outbreaks.

1           Efforts to develop and implement new mosquito control methods for urban and suburban  
2 conditions must consider the social, economic, and environmental factors that influence disease  
3 transmission dynamics in these settings (Bazin and Williams, 2018). Multidisciplinary  
4 collaborations between researchers, policymakers, public health authorities, and communities are  
5 essential for designing effective and sustainable strategies to reduce the burden of mosquito-  
6 borne diseases in urban areas.

7           The objectives of the present study are:

- 8           1. To introduce a novel method for mosquito control specifically designed for urban and  
9           suburban areas, addressing the unique challenges these environments present.
- 10          2. To present the concept of Human-Controlled Breeding Sites (HCBS) as a new, innovative  
11          approach to mosquito population reduction by providing a controlled environment for  
12          mosquito females to oviposit their eggs within households.
- 13          3. To describe the design and functionality of the Human-Controlled Breeding Site device,  
14          emphasizing its potential as a supplementary component of Integrated Mosquito  
15          Management (IMM) strategies.
- 16          4. To investigate the oviposition preferences of mosquito females by testing multiple colors  
17          within the Human-Controlled Breeding Sites devices, aiming to identify the most  
18          attractive color for egg-laying and optimize the effectiveness of the control method.

19           This paper is structured into three main components. In Section 3.1, we detail the  
20 meticulous development of the new HCBS method, laying the foundational groundwork for  
21 substantiating the subsequent exploration and validation of the HCBS methodology. Section 3.2  
22 delves into the intricate development of the HCBS device, an essential component for

1 implementing the HCBS approach effectively. Finally, Section 3.3 is dedicated to describing the  
2 experiment conducted to validate the HCBS methodology, offering insights into its practical  
3 application and efficacy in mosquito population control. Together, these integrated components  
4 provide a comprehensive understanding of the HCBS approach, effectively bridging the gap  
5 between methodological development, device design, and practical application.

## 6 **2. LITERATURE REVIEW:**

7 Mosquito-borne diseases pose significant threats to public health, particularly in tropical  
8 and subtropical regions worldwide. Among the most notorious mosquito-borne illnesses are  
9 Dengue fever, Malaria, Yellow Fever, West Nile virus and Zika, which collectively cause  
10 millions of cases and thousands of deaths each year (World Health Organization, 2020).  
11 Controlling the populations of disease-carrying mosquitoes is crucial for reducing the  
12 transmission and burden of these diseases. In this literature review, we explore the biology and  
13 behavior of mosquitoes, existing control methods, factors influencing mosquito attraction, and  
14 the relationship between mosquito species and disease transmission.

### 15 **2.1 Mosquito Biology and Behavior**

16 Mosquitoes, belonging to the Culicidae family, are small, flying insects characterized by  
17 their slender bodies, long legs, and elongated mouthparts adapted for piercing and sucking blood  
18 (Clements, 1999). The life cycle of mosquitoes consists of four stages: egg, larva, pupa, and  
19 adult.

20 Male and female mosquitoes exhibit significant differences in their lifespans. Male  
21 mosquitoes typically live for up to 10 days (Clements, 1999, Lambert et. al. 2022), while females  
22 can survive for a few weeks (Foster and Walker, 2009). Some sources suggest that males live for

1 1-2 weeks (Service, 2012), and females typically live anywhere from two to four weeks (Scott  
2 and Takken, 2012).

3 The primary reason for this difference in lifespan is the distinct roles each gender plays  
4 within the species. Males primarily live to mate and do not play a major role in the reproductive  
5 cycle after mating (Service, 2012). On the other hand, female mosquitoes require extended  
6 periods of life to lay eggs (Clements, 1999).

7 Moreover, the feeding habits of male and female mosquitoes also contribute to their  
8 lifespan differences. Male mosquitoes feed only on plant nectar and sugary liquids, such as fruit  
9 juices and honeydew (Clements, 1999). In contrast, female mosquitoes feed on blood in addition  
10 to plant nectar, which provides the necessary nutrients for egg production (Foster and Walker,  
11 2009).

12 Therefore, the differences in lifespan between male and female mosquitoes can be  
13 attributed to their distinct roles in reproduction and their different feeding habits (Clements,  
14 1999; Foster and Walker, 2009; Service, 2012; Scott and Takken, 2012), although a new study  
15 suggest the lifespan difference can be less (Lambert et al., 2022).

16 Environmental factors significantly influence mosquito biology and behavior, with  
17 temperature, humidity, and the availability of breeding sites playing crucial roles in shaping  
18 mosquito population dynamics and distribution (Hugo et al., 2014; Paaijmans et al., 2009).  
19 Human-related factors, such as urbanization (Durrance-Bagale et al., 2024) and changes in land  
20 use, can also have a substantial impact on mosquito habitats and abundance (Gubler, 2011;  
21 Leisnham et al., 2014). Additionally, characteristics like water type (Sumba et al., 2008), larvae  
22 density (Allan and Kline, 1998; Gimnig et al., 2002; Kiflawi et al., 2003; Koenraadt and Takken,  
23 2003), and even pheromone emissions by conspecific larvae (Chadee, 1993; Sumba et al., 2008)

1 influence oviposition behavior. However, a common thread among these factors is the necessity  
2 of water in all oviposition sites.

## 3 **2.2 Mosquito Control Methods**

4 The World Health Organization (WHO, 2009) advocates for integrated vector  
5 management (IVM) and suggests four major strategies: Chemical control involves the use of  
6 insecticides to kill mosquito larvae and adults. These variously comprise fogging, residual  
7 spraying, larviciding, and autodissemination. However, the emergence of insecticide resistance  
8 poses challenges to the effectiveness of chemical control efforts (Hemingway and Ranson,  
9 2000).

10 Biological control methods harness natural enemies of mosquitoes, such as predators and  
11 parasites, to reduce mosquito populations. Predatory fish, such as *Gambusia affinis* (mosquito  
12 fish), feed on mosquito larvae and are used in biological control programs (Sota and Mogi,  
13 1992). Additionally, genetically modified mosquitoes are being developed as a novel approach to  
14 suppress mosquito populations (Alphey et al., 2002).

15 Environmental management strategies focus on reducing mosquito breeding sites and  
16 modifying habitats to make them less suitable for mosquito development. Source reduction  
17 techniques involve eliminating or treating standing water where mosquitoes breed, while habitat  
18 modification aims to alter environmental conditions to discourage mosquito proliferation  
19 (Heintze et al., 2007).

20 Personal barrier measures involve using barriers like window screens, mosquito nets,  
21 repellents, or protective clothing to prevent mosquito bites.

1 Integrated Mosquito Management (IMM) emphasizes the coordinated use of multiple  
2 control methods tailored to local conditions. Surveillance, larval control, adult control, and  
3 community engagement are key components of IMM programs aimed at reducing mosquito  
4 populations and disease transmission (World Health Organization, 2019).

### 5 **2.3 Mosquito Attraction and Repellents**

6 Mosquitoes are attracted to their hosts by a combination of visual and chemical cues.  
7 Visual cues, such as color, play a role in mosquito attraction. Research suggests that mosquitoes  
8 are more attracted to dark colors, possibly due to their increased visibility against contrasting  
9 backgrounds (Foster and Hancock, 1994).

10 Chemical cues, including carbon dioxide (CO<sub>2</sub>) and human body odors, also influence  
11 mosquito host-seeking behavior. Mosquitoes are highly sensitive to CO<sub>2</sub>, which is emitted by  
12 humans during respiration and serves as a potent attractant for female mosquitoes seeking blood  
13 meals (Takken and Knols, 1999). Additionally, human skin odors, such as lactic acid and  
14 ammonia, can attract mosquitoes from a distance (Logan et al., 2008).

15 Various repellents are available to protect against mosquito bites. Synthetic chemicals,  
16 such as DEET (N,N-diethyl-meta-toluamide), are widely used and highly effective at repelling  
17 mosquitoes (Frances and Cooper, 2005). Plant-derived repellents, such as citronella and  
18 eucalyptus oil, offer alternative options for personal protection against mosquito bites (Maia and  
19 Moore, 2011).

### 20 **2.4 Mosquito Species and Disease Transmission**

21 Different mosquito species exhibit varying degrees of vector competence for transmitting  
22 diseases to humans. *Aedes aegypti* and *Aedes albopictus* are primary vectors of Dengue fever,



1 Zika virus, West Nile virus and Chikungunya virus, with *Aedes aegypti* being particularly  
2 efficient in urban environments (Lambrechts et al., 2010). *Anopheles* mosquitoes are the main  
3 vectors of Malaria, transmitting Plasmodium parasites to humans through their blood meals  
4 (Sinka et al., 2012).

5 The relationship between mosquito species and disease transmission is influenced by  
6 factors such as vector biology, host preferences, and pathogen development. Understanding the  
7 ecology and behavior of mosquito vectors is essential for implementing targeted control  
8 measures to reduce disease transmission (Weiss et al., 2019).

## 9 **2.5 Mosquito's oviposition ethology**

10 Mosquito oviposition behavior, influenced by various factors including color preferences  
11 and environmental cues, plays a crucial role in the transmission of diseases. Different mosquito  
12 species exhibit distinct preferences in color for oviposition sites, often correlating with the  
13 diseases they transmit. Understanding these ethological preferences is essential for effective  
14 vector control strategies and disease prevention efforts.

### 15 *2.5.1 Aedes aegypti:*

16 *Aedes aegypti* is a primary vector of several devastating diseases, including dengue fever,  
17 Zika virus, West Nile virus, and chikungunya. Research has shown that *Aedes aegypti* females  
18 exhibit a preference for dark colors such as black and brown for oviposition sites (Bentley and  
19 Day, 1989). These dark-colored sites often contain stagnant water, such as discarded containers,  
20 which serve as breeding grounds for *Aedes* mosquitoes.

21

1           2.5.2 *Aedes albopictus*:

2           Another important vector species, *Aedes albopictus*, is associated with the transmission  
3 of diseases such as dengue fever, Zika virus, West Nile virus, and chikungunya. Unlike *Aedes*  
4 *aegypti*, *Aedes albopictus* displays a preference for lighter colors like white or light blue for  
5 oviposition (Koenraadt et al., 2003). These preferences may vary depending on environmental  
6 conditions and habitat characteristics, influencing the distribution of oviposition sites and disease  
7 transmission patterns.

8           2.5.3 *Culex pipiens*:

9           *Culex pipiens* is a widespread mosquito species known for transmitting West Nile virus, a  
10 potentially severe neurological disease transmitted to humans and other vertebrate hosts. Studies  
11 have indicated that *Culex pipiens* females prefer oviposition sites with high organic content,  
12 often found in dark-colored water bodies (Rey et al., 2006).

13           2.5.4 *Anopheles spp.*:

14           *Anopheles* mosquitoes are vectors of malaria parasites, a life-threatening disease that  
15 affects millions of people worldwide. Different species within the *Anopheles* genus may exhibit  
16 varying oviposition preferences. For example, *Anopheles gambiae*, a major malaria vector in  
17 sub-Saharan Africa, shows a preference for dark-colored oviposition sites (Munga et al., 2006).  
18 These sites, often found in natural water bodies like swamps and puddles, provide suitable  
19 breeding habitats for *Anopheles* mosquitoes and contribute to the transmission of malaria.

20           In addition to color preferences, environmental factors such as temperature, humidity, and  
21 vegetation also influence mosquito oviposition behavior and disease transmission dynamics.  
22 Mosquitoes prefer shaded areas with moderate temperatures and high humidity for oviposition,

1 as these conditions promote larval survival and development (Lounibos, 2002). Vegetation  
2 provides additional shelter and resources, creating ideal habitats for mosquito breeding and  
3 disease transmission (Clements, 1999).

#### 4 *2.5.5 Oviposition radius*

5 Gravid mosquito females exhibit a remarkable ability to search for suitable oviposition  
6 sites, often traveling significant distances and enduring varying environmental conditions to lay  
7 their eggs in standing water. The duration and distance traveled by gravid females largely depend  
8 on factors such as species, habitat availability, and physiological state. For instance, *Aedes*  
9 mosquitoes, vectors of diseases like dengue and Zika, have been observed to travel up to several  
10 hundred meters in search of suitable breeding sites, with some individuals capable of flying  
11 distances of over a kilometer (Service, 1997). Similarly, *Anopheles* mosquitoes, responsible for  
12 transmitting malaria, are known to actively seek out water bodies for oviposition, often traveling  
13 several kilometers from their blood-feeding sites (Clements, 1999). Gravid females may spend  
14 several days or even weeks in search of suitable oviposition sites, utilizing various sensory cues  
15 and environmental cues to guide their behavior (Clements, 1999). This remarkable behavior  
16 underscores the importance of effective mosquito control strategies to target breeding sites and  
17 minimize the risk of disease transmission.

#### 18 *2.5.6 Mosquito eggs viability*

19 Mosquito eggs possess remarkable resilience, capable of surviving in a desiccated state  
20 for extended periods. Research indicates that mosquito eggs can remain viable for varying  
21 durations without water, depending on species and environmental conditions. For instance,  
22 *Aedes* mosquitoes, known vectors of diseases such as dengue and Zika, have been reported to  
23 maintain viability for up to several months under favorable conditions (Christophers, 1960).

1 Similarly, studies on *Anopheles* mosquitoes, responsible for transmitting malaria, suggest that  
2 their eggs can endure desiccation for several weeks, retaining the potential for hatching upon  
3 rehydration (Service, 1997). This adaptive trait enables mosquito eggs to persist through adverse  
4 environmental conditions, contributing to the resilience and persistence of mosquito populations.

5 Mosquito eggs are typically laid on the surface of standing water, although some species  
6 may deposit them on moist substrates near water bodies. The surface location of mosquito eggs  
7 serves several crucial functions in the reproductive process. Firstly, positioning the eggs on the  
8 water surface provides protection from drowning and predation, as it allows for easy access to  
9 atmospheric oxygen for respiration (Clements, 1999). Additionally, the surface tension of the  
10 water supports the buoyancy of the eggs, preventing them from sinking and facilitating their  
11 development (Clements, 2000).

12 The exchange of oxygen is vital for the survival and development of mosquito eggs. Like  
13 all insect eggs, mosquito eggs require oxygen for respiration during embryonic development.  
14 The thin outer layer of the egg, called the chorion, is permeable to gases, allowing oxygen to  
15 diffuse into the egg while carbon dioxide is released (Clements, 1999). This exchange of gases  
16 through the eggshell is essential for maintaining aerobic respiration and ensuring the viability of  
17 the developing embryo.

18 Various household substances have been identified for their efficacy in destroying  
19 mosquito eggs, ranging from natural and environmentally friendly options to chemical  
20 compounds with larvicidal properties. Soap disrupts water surface tension, suffocating mosquito  
21 eggs, while vinegar creates an inhospitable acidic environment hindering egg development.  
22 Essential oils like citronella possess larvicidal properties, deterring egg-laying and destroying  
23 existing eggs, and diluted bleach solutions disrupt larvae and egg integrity. Additionally, a thin

1 layer of vegetable oil forms a barrier on water surfaces, suffocating eggs. However, effectiveness  
2 can vary based on factors like concentration and application method, emphasizing the need for  
3 caution, especially with chemical-based products, to ensure safety for humans and non-target  
4 organisms. (Rajapaksa et al., 2014; Clements, 1999; Maia and Moore, 2011)

### 5 **3. MATERIALS AND METHODS:**

#### 6 **3.1 The Human-Controlled Breeding Site (HCBS) method**

7 The HCBS method represents a proactive approach to controlling mosquito populations  
8 through targeted intervention at key stages of the mosquito life cycle. This section delineates the  
9 step-by-step methodology for implementing the HCBS method, emphasizing its efficacy in  
10 attracting gravid female mosquitoes and disrupting the mosquito reproductive process.

##### 11 *3.1.1 Deployment of HCBS Devices*

12 The first step in the HCBS method involves the strategic placement of HCBS devices in  
13 areas susceptible to mosquito breeding in urban and suburban environments. HCBS devices are  
14 positioned at floor level to maximize visibility to flying female mosquitoes while remaining  
15 inconspicuous to human observation. The devices are distributed evenly across the target area to  
16 ensure comprehensive coverage and efficacy in mosquito population control.

17 To minimize breeding site competition effectively, two strategies are essential: (a) the  
18 elimination of existing breeding sites, and/or (b) the incorporation of other standing water  
19 sources into the HCBS system. In the former approach, the nearest breeding site would be the  
20 HCBS device, compelling gravid mosquitoes to utilize it exclusively. Conversely, in the latter  
21 approach, regulating potential standing water sources to align with the HCBS methodology  
22 transforms them into functional HCBS devices.

1            *3.1.2 Attracting Gravid Female Mosquitoes*

2            Once installed, HCBS devices are designed to attract gravid female mosquitoes seeking  
3 oviposition sites for eggs that must be laid. The design features of the HCBS devices, including a  
4 shallow basin and a portion of the water surface covered from light, mimic natural breeding  
5 habitats favored by mosquitoes. This strategic design encourages female mosquitoes to lay their  
6 eggs in the HCBS devices, thereby initiating the mosquito life cycle within a controlled  
7 environment.

8            *3.1.3 Removal and Treatment of Water*

9            After a predetermined period, typically 10 days to coincide with the development of  
10 mosquito larvae into pupae, the water from the HCBS devices is carefully removed and  
11 transferred to a separate container. This step is crucial since if the water is not removed within  
12 this timeframe, mosquito pupae will emerge as adults, rendering the method ineffective and  
13 inadvertently contributing to mosquito reproduction. Moving forward, it is imperative to explore  
14 the feasibility of automating the water replacement process in HCBS devices to mitigate this  
15 issue and ensure the continued efficacy of mosquito population control efforts.

16            *3.1.4 Destroying and killing the collected eggs, larvae and pupas.*

17            One option to destroy and kill the eggs, larvae and pupas from the HCBS devices, it's to  
18 treat it with household substances known for their larvicidal properties. Common substances  
19 such as soap, vinegar, essential oils, or bleach are added to the water to destroy mosquito eggs,  
20 larvae, and pupae present in the container. This targeted treatment ensures the eradication of  
21 mosquito offspring and prevents their proliferation in the environment (see Section 2.5.5).

1           It is crucial to emphasize that only water should be poured into the HCBS container. If  
2 the mosquito female detects traces of other substances, including insecticides or household  
3 products discussed previously, there is a risk that she may reject the HCBS device as an  
4 oviposition site. This would render the method ineffective and unsuitable for mosquito  
5 population control.

6           In dire scenarios where household substances are unavailable, simply pouring the water  
7 from the HCBS device onto a dry surface can effectively eliminate larvae and pupae but not  
8 necessary eggs. However, the easiest alternative to kill the individuals on the three stages is just  
9 to bury the collected water beneath a few centimeters of soil (in a garden or even a pot), thus  
10 ensuring continued mosquito population control.

### 11           *3.1.5 Reinstallation of HCBS Devices*

12           Following treatment, the HCBS devices are refilled with fresh water and reinstated in  
13 their original location.

## 14           **3.2 Considerations taken during the design of the HCBS Device**

15           The design of the Human-Controlled Breeding Site (HCBS) device was informed by a  
16 comprehensive literature review on mosquito ethology and its interactions with humans (Section  
17 2). Understanding the behavior of mosquitoes and their preferences for oviposition sites needs  
18 was crucial in developing an effective breeding site for controlling mosquito populations.

### 19           *3.2.1 Shape Design*

20           The HCBS device was designed with a shallow basin to mimic natural breeding habitats  
21 favored by mosquitoes. Its shape allows for a relatively large-exposed water surface, providing

1 ample space for egg deposition. Additionally, the device incorporates a portion of the water  
2 surface covered from light, offering protection to mosquito offspring against potential predators.

### 3 *3.2.2 Color Selection*

4 Five colors were selected for testing the HCBS device: White, Black, Red, Green, and  
5 Blue. Color selection played a significant role in determining the attractiveness of the device to  
6 gravid female mosquitoes. The color of the HCBS device was chosen to ensure visibility to  
7 mosquito females while remaining semi-hidden to humans. This balance is crucial to ensure that  
8 mosquitoes perceive the oviposition site as hidden from predators.

### 9 *3.2.3 Placement and Visibility*

10 The HCBS device is ideally located at floor level to ensure maximum visibility from  
11 flying female mosquitoes seeking oviposition sites. It must be strategically positioned to be  
12 visible to mosquito females while remaining semi-hidden from human view, creating the  
13 perception of a secure oviposition place away from predators.

### 14 *3.2.4 Additional Features*

15 To facilitate transportation and maintenance, the HCBS device is equipped with a cap or  
16 slicing cover to close the exposed water surface when not in use or during harvesting. This  
17 feature ensures the integrity of the breeding site and prevents contamination. Importantly, no  
18 insecticides or mosquito-killing devices are added to the water within the HCBS to avoid  
19 deterring gravid female mosquitoes from ovipositing.

## 20 **3.3 Experiment design**

21 The experiment was conducted in Peru, specifically in the department of Lima, within the  
22 district of La Molina, which is situated at an altitude of approximately 237 meters above sea



1 level. Its geographical coordinates are approximately 12.0760° S latitude and 76.9502° W  
2 longitude. This region experiences climatic conditions typical of a coastal desert, characterized  
3 by moderate temperatures, high relative humidity, and minimal rainfall. During the months of  
4 February to May, which coincide with the austral summer, La Molina typically records average  
5 temperatures ranging from 22°C to 27°C. Relative humidity levels vary between 60% to 70%.  
6 Rainfall is scarce, with an average total annual precipitation of less than 10 millimeters.

7 The mosquito species commonly found in this area include *Aedes aegypti*, the primary  
8 vector for diseases such as dengue, Zika, and chikungunya. Additionally, *Culex quinquefasciatus*,  
9 known for transmitting West Nile virus, and *Anopheles* species responsible for malaria  
10 transmission, are also prevalent in the region.

11 The experiment was designed to evaluate the efficacy of Human-Controlled Breeding  
12 Site (HCBS) devices in attracting gravid female mosquitoes for oviposition, with a focus on  
13 color preference. The HCBS devices were specially designed based on findings from the  
14 literature review on mosquito ethology and breeding site preferences. Using 3D printing  
15 technology, the devices were fabricated in ABS material in five different colors: white, black,  
16 red, green, and blue.

### 17 3.3.1 Installation and Setup

18 All HCBS devices were filled to the middle with potable water and installed in the same  
19 location, following the specified placement guidelines to ensure maximum visibility to flying  
20 female mosquitoes. After 10 days of exposure to mosquito access, the HCBS devices were  
21 capped and removed from their location. To minimize potential biases due to the very specific  
22 location of each HCBS device within the installation location, the distribution of colors among

1 HCBS devices was randomly altered at each reinstallation. This process was replicated five times  
2 to ensure robustness and reliability of the findings.

### 3 *3.3.2 Data Collection and Analysis*

4 In the laboratory, a count of larvae and pupae from each HCBS device was conducted to  
5 evaluate mosquito attraction. Due to equipment constraints, egg counts were not feasible for this  
6 experiment, and therefore, only larvae and pupae were included in the tally. After counting, the  
7 HCBS devices were refilled with water and reinstalled in their original location.

8 It's worth noting that in our study, we prioritized assessing the functionality of HCBS  
9 rather than eradicating the mosquito population in our test area. Consequently, the eggs, larvae,  
10 and pupae were not eradicated after collection; instead, they were transferred to another  
11 container to mature into adults and contribute to the ongoing mosquito population in the study  
12 area. This approach ensured a consistent supply of adult mosquitoes for testing the effectiveness  
13 of HCBS methodology and devices.

### 14 *3.3.3 Laboratory Environment*

15 The installation site was situated inside a laboratory exposed to mosquito access,  
16 providing a semi-controlled environment for the experiment (conditions similar to those of a  
17 room in a house). This setting allowed for consistent conditions across replicates and minimized  
18 external variables that could influence mosquito behavior and oviposition decisions.

## 19 **4. RESULTS AND DISCUSSION:**

### 20 **4.1 The design**

21 Figure 1 shows the final design of the HCBS device used in our study whereas Figure 2  
22 shows the different color devices installed during the experiment.

1

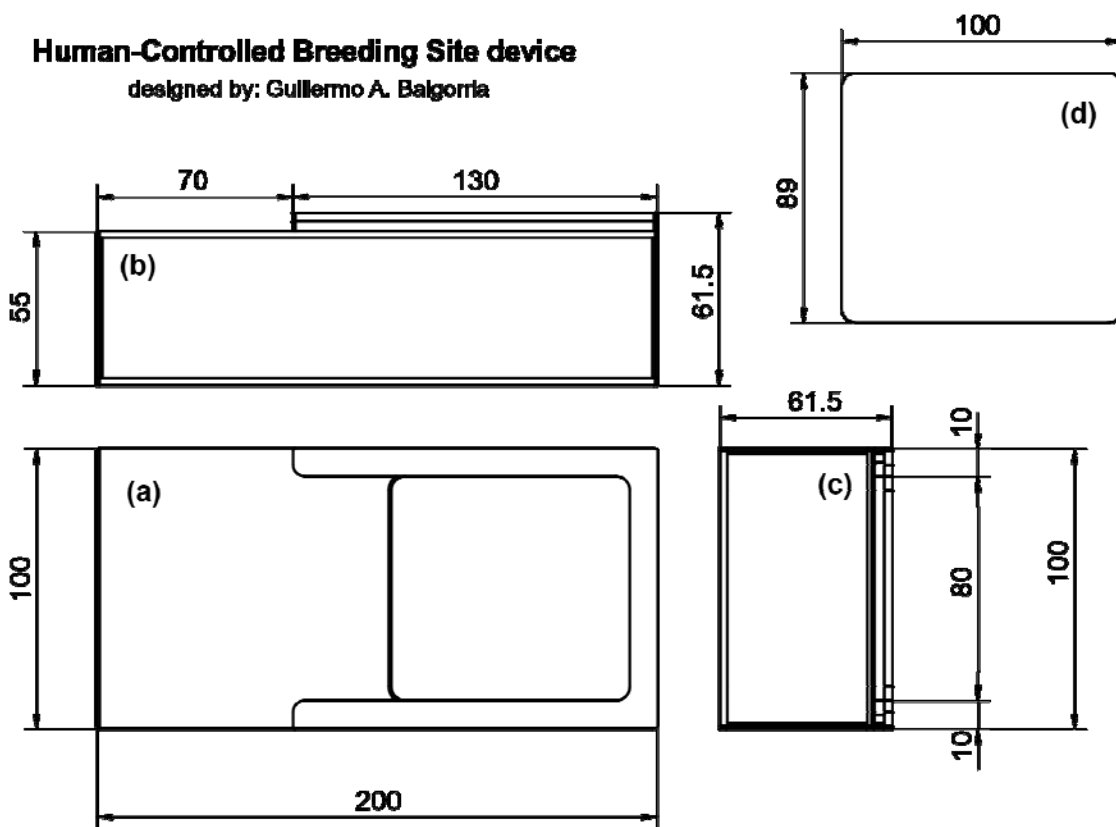

2

3 **Figure 1:** Design drawings of the HCBS device, showing (a) top view of the body, (b) side view  
4 of the body, (c) front view of the body, and (d) top view of the slicing cap. Measurements are in  
5 millimeters (mm).

6 The slicing cap (d) is placed on the top view of the body (a), enabling slicing between  
7 both arms for easy opening and closing of the HCBS device.

8

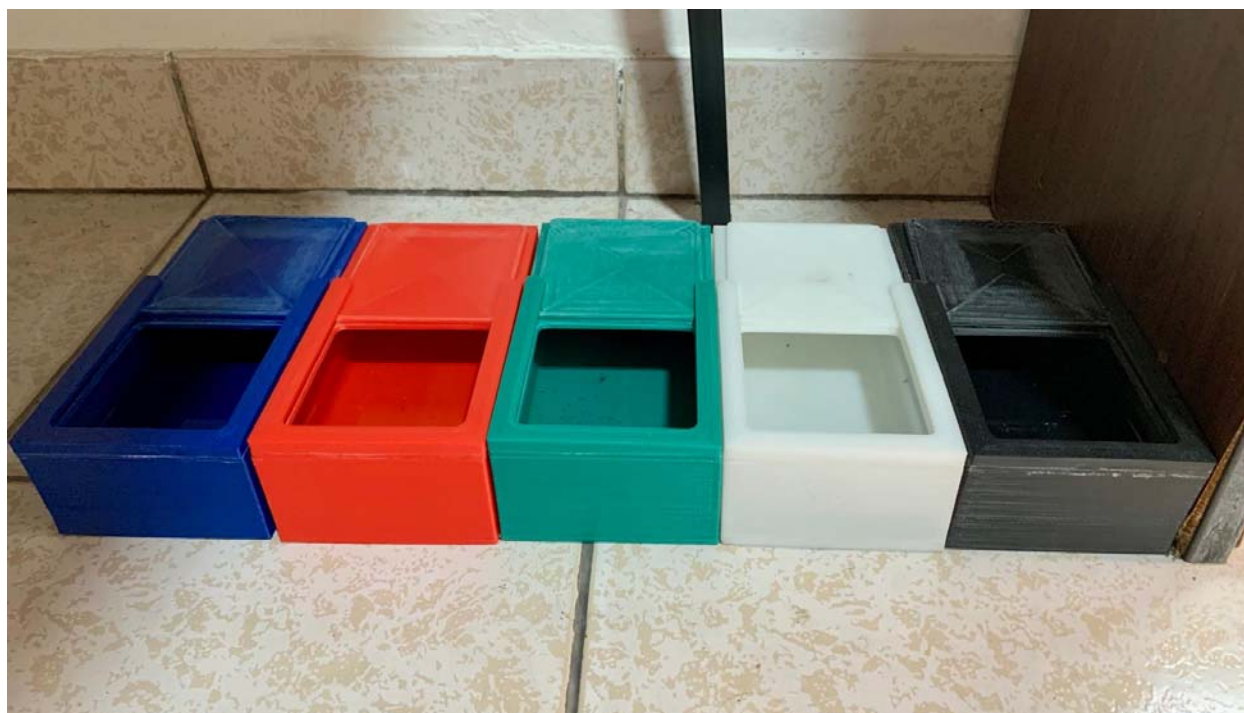

1  
2 **Figure 2:** Photograph depicting HCBS devices in all colors used during the experiment,  
3 installed in their respective locations.

#### 4 **4.2 Experiment results**

##### 5 *4.2.1 Results on the HCBS method*

6 The successful deposition of eggs by gravid mosquitoes into the HCBS devices, followed  
7 by the destruction of these individuals within the 10-day timeframe, serves as compelling  
8 evidence of the efficacy of the system. This crucial demonstration underscores the functionality  
9 of both the HCBS method and device. Without the presence of HCBS devices, these eggs would  
10 have inevitably hatched, contributing to the burgeoning mosquito population. Thus, the ability to  
11 attract gravid mosquitoes and disrupt their reproductive cycle within the designated timeframe  
12 serves as a robust validation of the HCBS system's effectiveness. This innovative approach  
13 challenges the commonly current recommendation to destroy all possible locations where

1 mosquitoes can lay their eggs, providing a controlled environment for oviposition within  
2 households while simultaneously reducing mosquito populations at the source.

### 3 4.2.2 Results on the HCBS color device

4 The sampled adult mosquito population from the laboratory revealed that all captured  
5 mosquitoes belonged to the *Aedes aegypti* species.

6 **Table 1:** Number of mosquito's larvae and pupas in the HCBS devices by color and date:

| HCBS<br>device color | Harvesting date        |                        |                      |                      |                      |
|----------------------|------------------------|------------------------|----------------------|----------------------|----------------------|
|                      | April 20 <sup>th</sup> | April 30 <sup>th</sup> | May 10 <sup>th</sup> | May 20 <sup>th</sup> | May 30 <sup>th</sup> |
| Black                | 0                      | 0                      | 0                    | 0                    | 0                    |
| Blue                 | 0                      | 0                      | 0                    | 0                    | 0                    |
| Green                | 2                      | 8                      | 17                   | 15                   | 12                   |
| Red                  | 0                      | 0                      | 0                    | 0                    | 0                    |
| White                | 0                      | 0                      | 0                    | 0                    | 0                    |

7  
8 After tallying the larvae and pupae across all HCBS devices, a significant statistical  
9 difference was observed in the number of specimens collected, particularly between the green  
10 HCBS device and those of other colors. This difference can be attributed to mosquitoes'  
11 exclusive initial preference for ovipositing in the green device, as detailed in Table 1. Counting  
12 ceased after 50 days when no oviposition was detected in HCBS devices of other colors,  
13 although the devices remained operational in the laboratory. However, subsequent inspections  
14 revealed the presence of larvae in the red HCBS device. Two weeks later, larvae were also found  
15 in the white device, followed by the black device a week after, and eventually in the blue device.

1 Although the counting had already stopped, preventing precise quantification of individuals, it is  
2 crucial to note these later observations. These findings suggest that while green is the preferred  
3 color for oviposition, it is not an indispensable condition for gravid mosquitoes to oviposit.

4 The Human-Controlled Breeding Sites (HCBS) method demonstrates remarkable efficacy  
5 in controlling mosquito populations, exerting influence over three of the four life stages of  
6 mosquitoes. Our findings confirm that when HCBS is correctly applied, it achieves a 100%  
7 effectiveness in disrupting the mosquito life cycle by collecting laid egg and eliminating all  
8 together with larvae and pupae previously hatched.

9 One of the key advantages of HCBS is its low implementation cost, which promotes  
10 widespread citizen participation in mosquito reduction campaigns. This cost-effectiveness not  
11 only encourages community engagement but also facilitates the scalability of mosquito control  
12 efforts in urban and suburban areas.

13 In the event of massive HCBS deployment in urban and suburban environments, a  
14 significant reduction in mosquito populations can be anticipated. By disrupting reproduction,  
15 HCBS ensures that the current adult mosquito population will be the last local generation. Within  
16 a short timeframe, typically within 1 week to 10 days, the absence of male mosquitoes prevents  
17 fertilization, effectively limiting the population's ability to replenish since only unfertilized  
18 female mosquitoes would theoretically remain alive after this period.

19 While the primary focus of HCBS implementation is in urban and suburban areas, its  
20 potential applicability in rural settings warrants consideration. Gravid female mosquitoes tend to  
21 seek the closest and safest place to lay their eggs. With HCBS devices installed within or around  
22 houses, mosquitoes are likely to prefer ovipositing in the HCBS rather than expending energy to  
23 find distant natural environments where predators exist (see Section 2.5.5). Although its

1 effectiveness may be somewhat diminished compared to urban areas, HCBS still serves to reduce  
2 local mosquito populations and disrupt the feedback loop of mosquito repopulation in natural  
3 environments.

4 Our study also identifies the importance of device color selection in optimizing HCBS  
5 effectiveness. Among the colors tested, green HCBS devices consistently demonstrated the  
6 highest efficacy in attracting gravid female mosquitoes for oviposition; however, it is not an  
7 indispensable condition. Additionally, HCBS devices must have a portion of the water surface  
8 shielded from light. This feature makes female mosquitoes more likely to select this device for  
9 oviposition, as it offers protection for their offspring against predators. This issue was verified  
10 during the retrieval and counting of the individuals collected in the laboratory. When the slicing  
11 cap of the HCBS device was opened under the lights, all larvae swiftly moved towards the  
12 shaded water within the device. This finding underscores the importance of considering mosquito  
13 behavior and preferences in the design of effective mosquito control strategies.

14 Overall, the findings of this study underscore the potential of HCBS as a valuable  
15 addition to Integrated Mosquito Management strategies, particularly in urban and suburban  
16 settings. By targeting multiple life stages of mosquitoes and incorporating features that enhance  
17 attractiveness and efficacy, HCBS offers a promising approach to reducing mosquito populations  
18 and mitigating the transmission of mosquito-borne diseases in diverse environments. Further  
19 research and field trials are warranted to explore the long-term effectiveness and scalability of  
20 HCBS implementation in different geographic contexts. Additionally, optimizing the design of  
21 HCBS devices warrants attention to maximize their efficacy and applicability. Finally, the HCBS  
22 method can undergo evaluation for potential application in combating other insect-borne vector  
23 diseases.

1           One suggestion is to leverage disaster risk management systems capable of widespread  
2 communication via SMS text messages to convey crucial information to residents in a specific  
3 area. The proposal involves utilizing a country's system to coordinate the simultaneous  
4 installation of HCBS devices across the entire community or city. Similarly, on the 10<sup>th</sup> day,  
5 residents would receive alerts prompting them to harvest and reinstall the HCBS devices. This  
6 approach ensures uniform implementation of control programs throughout the community,  
7 reminding residents simultaneously to remove the devices to mitigate the negative effects  
8 discussed in Section 3.3.3.

## 9 **5. CONCLUSIONS**

10           The Human-Controlled Breeding Site (HCBS) methodology is a groundbreaking  
11 approach that diverges from the common recommendation to eliminate all potential mosquito  
12 egg-laying sites. Instead, it creates controlled breeding sites to attract female mosquitoes for  
13 oviposition. Since humans oversee these sites, the eggs, larvae, and pupae can be effectively  
14 being mechanically destroyed before maturing into adult mosquitoes. HCBS proves to be a  
15 highly effective method for controlling mosquito populations due to its ability to intervene in  
16 multiple stages of the mosquito life cycle. By targeting three out of the four stages of mosquito  
17 development, HCBS offers a comprehensive approach to mosquito control that can significantly  
18 reduce mosquito populations and mitigate disease transmission in urban and suburban areas.  
19 HCBS provides a controlled environment within households where mosquito females can  
20 oviposit their eggs. By attracting gravid females to lay their eggs in the breeding site, HCBS  
21 devises effectively intercepts the first stage of mosquito development, preventing eggs from  
22 being laid in natural breeding habitats. Considering that the mosquito's life cycle in a water  
23 environment from egg to pupa has a timespan of around 10 days, at the time the HCBS is



1 harvested, it will contain individuals in all the three stages from eggs to pupas. At the time the  
2 water is discharged from the HCBS device, all the individuals collected are killed at once.

3 Although HCBS primarily targets the egg, larval, and pupal stages of the mosquito life  
4 cycle, it complements existing mosquito control methods that focus on adult mosquitoes. By  
5 intervening in multiple stages of mosquito development, HCBS provides a holistic approach to  
6 mosquito control that enhances the effectiveness of Integrated Mosquito Management (IMM)  
7 strategies. Additionally, the localized nature of HCBS allows for targeted control efforts in areas  
8 with high mosquito abundance or disease transmission, contributing to a more efficient and  
9 sustainable mosquitoes control programs.

10 The HCBS device developed in this study played a pivotal role in facilitating the  
11 scientific experimentation of the HCBS method, offering insights into critical factors such as  
12 color selection for enhancing system efficiency. However, the paramount aspect lies in the  
13 adaptability of the HCBS methodology, as any household receptacle capable of retaining water  
14 for over 10 days can serve as an HCBS device (e.g., cups, big-mouth bottles, dishes, etc.). When  
15 considering alternative household HCBS devices, key considerations include color, shading, and  
16 total water surface area exposed to attract gravid mosquitoes for oviposition. It is important to  
17 remember that eggs must be laid, and gravid mosquitoes require standing water for this purpose,  
18 with no preferred options being available for their reproduction, any source will do. If we control  
19 the source, then we control the reproduction of those mosquitoes.

20 In dire scenarios where household substances are unavailable, simply pouring the water  
21 from the HCBS device onto a dry surface can effectively eliminate larvae and pupae but not  
22 necessary eggs. However, the easiest alternative to kill the individuals on the three stages is just

1 to bury the collected water beneath a few centimeters of soil in a garden or pot, ensuring  
2 continued mosquito population control.

3 In conclusion, this study presents a promising methodology for mosquito population  
4 control through HCBS methodology especially for urban and suburban areas. By providing a  
5 sustainable and effective means of reducing mosquito populations, especially in areas endemic to  
6 diseases like dengue fever, yellow fever, West Nile virus, Zika, and others, we envision a  
7 substantial contribution to global health initiatives. Implementing this innovative approach on a  
8 larger scale holds the potential to significantly mitigate the burden of mosquito-borne diseases  
9 worldwide, enhancing public health outcomes and promoting sustainable development.

## 10 **COMPETING INTERESTS**

11 The authors declare no competing interest.

## 12 **ACKNOWLEDGMENTS**

13 The authors acknowledge the use of generative AI technology ChatGPT 3.5. to improve  
14 the paper's reading.

## 15 **REFERENCES**

- 16 Allan, S.A. and Kline, D.L. (1998). Larval rearing water and pre-existing eggs influence  
17 oviposition by *Aedes aegypti* and *Ae. albopictus* (Diptera: Culicidae). *J. Med. Entomol.*  
18 35:943–947.
- 19 Alphey, L., Beard, C.B., Billingsley P., Coetzee, M., Crisanti, A., Curtis, C., Eggleston, P.,  
20 Godfray, C., Hemingway, J., Jacobs-Lorena, M., James, A.A., Kafatos, F.C., Mukwaya,  
21 L.G., Paton, M., Powell, J.R., Schneider, W., Scott, T.W., Sina, B., Sinden, R., Sinkins, S.,  
22 Spielman, A., Touré, Y. and Collins, F.H. (2002) Malaria control with genetically

- 1 manipulated insect vectors. *Science*. 298(5591):119-21. doi:10.1126/science.1078278.
- 2 PMID: 12364786.
- 3 Ananya, J. and Miller, C. (2021). Review of machine learning techniques for mosquito control in  
4 urban environments. *Ecological Informatics*. 61(2021) 101241.  
5 doi:<https://doi.org/10.1016/j.ecoinf.2021.101241>
- 6 Bazin, M. and Williams, C.R. (2018), Mosquito traps for urban surveillance: collection efficacy  
7 and potential for use by citizen scientists. *Journal of Vector Ecology*, 43: 98-103.  
8 doi:<https://doi.org/10.1111/jvec.12288>
- 9 Bentley, M.D. and Day, J.F. (1989). Chemical ecology and behavioral aspects of mosquito  
10 oviposition. *Annual Review of Entomology*, 34(1), 401-421.
- 11 Chadee, D.D. (1993). Oviposition response of *Aedes aegypti* (L.) to the presence of conspecific  
12 eggs in the field in Trinidad, W.I. *J. Fl. Med. Assoc.* 64:63–66.
- 13 Chadee, D.D., Martinez, R. and Teklehaimanot, A. (2009). Factors influencing the spatial  
14 distribution of *Aedes aegypti* and *Culex quinquefasciatus* (Diptera: Culicidae) in a mixed  
15 residential–industrial area in Trinidad. *Revista Panamericana de Salud Pública*, 25(2),  
16 142-151.
- 17 Christophers, S.R. (1960). *Aedes aegypti* (L.) the Yellow Fever Mosquito. Cambridge University  
18 Press.
- 19 Clements, A.N. (1999). *The Biology of Mosquitoes: Sensory Reception and Behaviour* (Vol. 2).  
20 CABI.
- 21 Clements, A.N. (2000). *The Biology of Mosquitoes: Development, Nutrition and Reproduction*  
22 (Vol. 1). CABI.

- 1 Durrance-Bagale, A., Hoe, N., Lai, J., Liew, J.W.K., Clapham, H. and Howard, N. (2024)  
2 Dengue vector control in high-income, city settings: A scoping review of approaches and  
3 methods. *PLoS Negl Trop Dis* 18(4): e0012081.  
4 doi:<https://doi.org/10.1371/journal.pntd.0012081>
- 5 Frances, S.P. and Cooper, R.D. (2005). Personal protection measures against mosquitoes:  
6 Insecticide-treated nets and repellents. *Insect Science*, 12(4), 289-297.
- 7 Foster, W.A. and Hancock, R.G. (1994). Nectar-related olfactory and visual attractants for  
8 mosquitoes. *Journal of the American Mosquito Control Association*, 10(3), 288-296.
- 9 Foster, W.A. and Takken, W. (2004). Nectar-related vs. human-related volatiles: behavioural  
10 response and choice by female and male *Anopheles gambiae* (Diptera: Culicidae)  
11 between emergence and first feeding. *Bulletin of Entomological Research*, 94(2), 145-  
12 157.
- 13 Foster, W.A. and Walker, E.D. (2009). Mosquitoes (Culicidae). In: Mullen, G., and Durden, L.  
14 (eds) *Medical and Veterinary Entomology*. Academic Press, pp. 207–259.
- 15 Gimmig, J.E., Ombok, M., Otieno, S., Kaufman, M., Vulule, J.M. and Walker, E.D. (2002).  
16 Density-dependent development of *Anopheles gambiae* (Diptera: Culicidae) larvae in  
17 artificial habitats. *J. Med. Entomol.* 39:162–172.
- 18 Guagliardo, S.A., Morrison, A.C., Barboza, J.L., Requena, E. and Astete, H. (2015). Patterns of  
19 geographic expansion of *Aedes aegypti* in the Peruvian Amazon. *PLoS Neglected*  
20 *Tropical Diseases*, 9(5), e0004045.
- 21 Gubler, D.J. (2011). Dengue, urbanization and globalization: the unholy trinity of the 21(st)  
22 century. *Tropical Medicine and Health*, 39(4 Suppl), 3-11.

- 1 Heintze, C., Garrido, M.V., Kroeger, A. and Whatley, A. (2007). Density-dependent host choice  
2 of disease vectors—its epidemiological implications. *Parasites and Vectors*, 1(1), 1-12.
- 3 Hemingway, J. and Ranson, H. (2000). Insecticide resistance in insect vectors of human disease.  
4 *Annual Review of Entomology*, 45(1), 371-391.
- 5 Hribar, L.J. and Leal, W.S. (2002). Oviposition behavior of *Toxorhynchites rutilus* and  
6 *Toxorhynchites violaceus*: responses to organic infusions. *Journal of the American*  
7 *Mosquito Control Association*, 18(1), 49-54.
- 8 Hugo, L.E., Jeffery, J.A., Trewin, B.J., Wockner, L.F., Thi Yen, N., Le, N.H., Nghia, L.T., Hine,  
9 E., Ryan P.A. and Kay, B.H. (2014). Adult survivorship of the dengue mosquito *Aedes*  
10 *aegypti* varies seasonally in central Vietnam. *PLOS neglected tropical diseases*. 8(2):  
11 e2669. doi:<https://doi.org/10.1371/journal.pntd.0002669>.
- 12 Juliano, S.A. (2009). Species interactions among larval mosquitoes: context dependence across  
13 habitat gradients. *Annual Review of Entomology*, 54, 37-56.
- 14 Kiflawi, M., Blaustein, L. and Mangel, M. (2003). Oviposition habitat selection by the mosquito  
15 *Culiseta longiareolata* in response to risk of predation and conspecific larval density.  
16 *Ecol. Entomol.* 28:168–173.
- 17 Koenraadt, C.J.M. and Takken, W. (2003). Cannibalism and predation among larvae of  
18 *Anopheles gambiae* complex. *Med. Vet. Entomol.* 17:61–66.
- 19 Koenraadt, C.J.M., Takken, W. and Dicke, M. (2003). The potential role of spectral composition  
20 of visual cues for the host-seeking behaviour of mosquitoes. *Entomologia*  
21 *Experimentalis et Applicata*, 108(1), 1-7.

- 1 Lafferty, K.D. (2009). The ecology of climate change and infectious diseases. *Ecology*, 90(4),  
2 888-900.
- 3 Lambert, B., North, A., Charles, H. and Godfray, J., (2022). A meta-analysis of longevity  
4 estimates of mosquito vector of disease. *BioRxiv* 2022.05.30.494059.  
5 doi:<https://doi.org/10.1101/2022.05.30.494059>.
- 6 Lambrechts, L., Scott, T.W. and Gubler, D.J. (2010). Consequences of the expanding global  
7 distribution of *Aedes albopictus* for dengue virus transmission. *PLoS Neglected Tropical*  
8 *Diseases*, 4(5), e646.
- 9 Leisnham, P.T., LaDeau, S.L. and Juliano, S.A. (2014). Spatial and temporal habitat segregation  
10 of mosquitoes in urban Florida. *PLoS ONE* 9(3): e91655.  
11 doi:[10.1371/journal.pone.0091655](https://doi.org/10.1371/journal.pone.0091655)
- 12 Logan, J.G., Birkett, M.A. and Semiochemicals, S. (2008). Semiochemicals for biting fly  
13 control: Their identification and exploitation. *Pest Management Science*, 64(6), 647-654.
- 14 Lounibos, L.P. (2002). Invasions by insect vectors of human disease. *Annual Review of*  
15 *Entomology*, 47(1), 233-266.
- 16 Maia, M.F. and Moore, S.J. (2011). Plant-based insect repellents: a review of their efficacy,  
17 development and testing. *Malaria Journal*, 10(1), S11.
- 18 Mora, C., McKenzie, T., Gaw, I.M., Dean, J.M., von Hammerstein, H., Knudson, T.A., Setter,  
19 R.O., Smith, C.Z., Webster, K.M., Patz, J.A. and Franklin, E.C. (2022). Over half of  
20 known human pathogenic diseases can be aggravated by climate change. *Nature Climate*  
21 *Change*. 2022. pmid:35968032. doi: <https://doi.org/10.1038/s41558-022-01426-1>.

- 1 Muller, G.C., Kravchenko, V.D., Schlein, Y. and Booth, M. (2020). Urban mosquito  
2 management: an adaptive and integrated approach. *Journal of Vector Ecology*, 45(2), 129-  
3 140.
- 4 Munga, S., Minakawa, N., Zhou, G., Barrack, O.O., Githeko, A.K, and Yan, G. (2006).  
5 Oviposition site preference and egg hatchability of *Anopheles gambiae*: effects of land  
6 cover types. *Journal of Medical Entomology*, 43(1), 27-34.
- 7 Paaajmans, K.P., Blanford, S., Bell, A.S., Blanford, J.I., Read, A.F, and Thomas, M.B. (2009).  
8 Influence of climate on malaria transmission depends on daily temperature variation.  
9 *Proceedings of the National Academy of Sciences*, 107(34), 15135-15139.
- 10 Rajapaksa, P., Rodrigo, W, and Fernando, S. (2014). Current status of insecticide resistance and  
11 mechanisms involved in the temephos selected *Aedes aegypti* (L.) from Sri Lanka.  
12 *Parasites and Vectors*, 7(1), 1-11.
- 13 Rey, J.R., Nishimura, N., Wagner, B. and Braks, M.A. (2006). Oviposition site selection by the  
14 dengue vector *Aedes aegypti* and its implications for dengue control. *Annals of the New*  
15 *York Academy of Sciences*, 1081(1), 328-332.
- 16 Service, M.W. (1997). *Mosquito Ecology: Field Sampling Methods*. Elsevier.
- 17 Service, M.W. (2012). *Medical Entomology for Students*. Cambridge University Press.
- 18 Sinka, M.E., Bangs, M.J., Manguin, S., Coetzee, M., Mbogo, C. M., Hemingway, J., Patil, A.P.,  
19 Temperly, W.H., Gething, P.W., Kabaria, C.W., Okara, R.M., van Boeckel, T., Godfray,  
20 H.C.J., Harbach, R.E. and Hay, S.I. (2012). The dominant *Anopheles* vectors of human  
21 malaria in Africa, Europe and the Middle East: occurrence data, distribution maps and  
22 bionomic précis. *Parasites and Vectors*, 5(1), 1-34.

- 1 Scott, T.W. and Takken, W. (2012). Feeding strategies of anthropophilic mosquitoes result in  
2 increased risk of pathogen transmission. *Trends in Parasitology*, 28(3), 114-121.
- 3 Sumba, L.A., Ogbunugafor, C.B., Deng, A.L. and Hassanali, A., (2008) Regulation of  
4 Oviposition in *Anopheles gambiae* s.s.: Role of Inter- and Intra-Specific Signals. *J Chem*  
5 *Ecol* 34, 1430–1436. <https://doi.org/10.1007/s10886-008-9549-5>.
- 6 Takken, W. and Knols, B.G. (1999). Odor-mediated behavior of Afrotropical malaria mosquitoes.  
7 *Annual Review of Entomology*, 44(1), 131-157.
- 8 Verhulst, N.O., Takken, W. and Dicke, M. (2010). Schreckstoff in vertebrates: conserved  
9 evolution and candidate chemosensory receptors. *Chemoecology*, 20(2), 119-130.
- 10 Weiss, D.J., Lucas, T.C.D., Nguyen, M., Nandi, A.K., Bisanzio, D., Battle, K.E., Cameron, E.,  
11 Twohig, K.A., Pfeffer, D.A., Rozier, J.A., Gibson, H.S., Rao, P.C., Casey, D., Bertozzi-  
12 Villa, A., Collins, E.L., Dalrymple, U., Gray, N., Harris, J.R., Howes, R.E., Kang, S.Y.,  
13 Keddie, S.H., May, D., Rumisha, S., Thorn, M.P., Barber, R., Fullman, N., Huynh, C.K.,  
14 Kulikoff, X., Kutz, M.J., Lopez, A.D., Mokdad, A.H., Naghavi, M., Nguyen, G.,  
15 Shackelford, K.A., Vos, T., Wang, H., Smith, D.L., Lim, S.S., Murray, C.J.L., Bhatt, S.,  
16 Hay, S.I. and Gething, P.W. (2019). Mapping the global prevalence, incidence, and  
17 mortality of *Plasmodium falciparum*, 2000-17: a spatial and temporal modelling study.  
18 *Lancet*, 394(10195):322-331. doi: 10.1016/S0140-6736(19)31097-9.
- 19 World Health Organization. (2019). Handbook for Integrated Vector Management. World Health  
20 Organization.
- 21 World Health Organization (WHO) and the Special Programme for Research and Training in  
22 Tropical Diseases (TDR), (2009). Dengue guidelines, for diagnosis, treatment, prevention



- 1 and control.; WHO Press. 147 p. ISBN: 9789241547871. (available at:
- 2 [https://iris.who.int/bitstream/handle/10665/44188/9789241547871\\_eng.pdf?sequence=1](https://iris.who.int/bitstream/handle/10665/44188/9789241547871_eng.pdf?sequence=1)).
- 3 World Health Organization. (2020). Vector-borne diseases. Retrieved from
- 4 <https://www.who.int/news-room/fact-sheets/detail/vector-borne-diseases>
